# Supplementary material for: ‘Not another safety culture survey’: using the Canadian patient safety climate survey (Can-PSCS) to measure provider perceptions of PSC across health settings
Source: PubMed Central journal article supplement — BMJ Qual Saf. 2013 Oct 11;23(2):162–70. doi: 10.1136/bmjqs-2013-002220 (PMC3913119; doi:10.1136/bmjqs-2013-002220), 2013-10-11
Supplement: bmjqs-2013-002220-s2.pdf [file bmjqs-2013-002220-s2.pdf]

**Table 1 – Factors Analysis Models**

(Items shown in **red text** are the 19 retained items that are recommended for the final measurement model of patient safety climate).

| Item# <sup>¥</sup>                                           | Item                                                                                                                                 | Measurement models tested |       |                             |                             |       |
|--------------------------------------------------------------|--------------------------------------------------------------------------------------------------------------------------------------|---------------------------|-------|-----------------------------|-----------------------------|-------|
|                                                              |                                                                                                                                      | EFA                       | CFA-1 | CFA-2<br>CFA-3 <sup>†</sup> | CFA-4<br>CFA-5 <sup>†</sup> | CFA-6 |
| <b>Organizational (senior) leadership support for safety</b> |                                                                                                                                      |                           |       |                             |                             |       |
| OL_1                                                         | Senior management has a clear picture of the risk associated with patient care                                                       | F1                        | F1    | F1                          | F1                          | F1    |
| OL_4                                                         | Patient safety decisions are made at the proper level by the most qualified people                                                   | F1                        | F1    | F1                          | F1                          | F1    |
| OL_5                                                         | Senior management provides a climate that promotes patient safety                                                                    | F1                        | F1    | F1                          | F1                          | F1    |
| OL_9                                                         | Senior management considers patient safety when program changes are discussed                                                        | F1                        | F1    | F1                          | F1                          | F1    |
| OL_22                                                        | My organization effectively balances the need for patient safety and the need for productivity                                       | F1                        | F1    | F1                          | *                           | n/a   |
| OL_2                                                         | Good communication flow exists up the chain of command regarding patient safety issues                                               | F1                        | F1    | *                           | n/a                         | n/a   |
| OL_23                                                        | I work in an environment where patient safety is a high priority                                                                     | F1                        | F1    | *                           | n/a                         | n/a   |
| <b>Incident follow up</b>                                    |                                                                                                                                      |                           |       |                             |                             |       |
| @17                                                          | If I report a patient safety incident, someone usually follows up to get more information from me                                    | F1                        | F7    | F7                          | F6                          | F6    |
| @20                                                          | If I point out a potentially serious patient safety incident, management will look into it                                           | F1                        | F7    | F7                          | F6                          | F6    |
| @24                                                          | Staff are usually given feedback about changes put into place based on incident reports                                              | F1                        | F7    | F7                          | F6                          | F6    |
| @8                                                           | There is no point in talking about a patient safety problem because nothing usually gets done about it                               | F1                        | F7    | *                           | n/a                         | n/a   |
| <b>Supervisory leadership for safety</b>                     |                                                                                                                                      |                           |       |                             |                             |       |
| SL_29                                                        | My supervisor/manager says a good word when he/she sees a job done according to established patient safety procedures                | F5                        | F5    | F5                          | F5                          | F5    |
| SL_30                                                        | My supervisor/manager seriously considers staff suggestions for improving patient safety                                             | F5                        | F5    | F5                          | F5                          | F5    |
| @27                                                          | If I made a serious error my manager would be supportive                                                                             | F5                        | F5    | *                           | n/a                         | n/a   |
| SL_31                                                        | Whenever pressure builds up, my supervisor/manager wants us to work faster, even if it means taking shortcuts                        | F6                        | F6    | F6                          | *                           | n/a   |
| SL_32                                                        | My supervisor/manager overlooks patient safety problems that happen over and over                                                    | F6                        | F6    | F6                          | *                           | n/a   |
| LC_37                                                        | On this unit, it is difficult to discuss errors                                                                                      | F6                        | F6    | F6                          | *                           | n/a   |
| @15                                                          | On this unit it is difficult to speak up if you feel there is a problem related to patient safety                                    | F6                        | F6    | *                           | n/a                         | n/a   |
| @19                                                          | On this unit it is difficult to question the decisions or actions of those with more authority                                       | F6                        | F6    | *                           | n/a                         | n/a   |
| <b>Unit learning culture</b>                                 |                                                                                                                                      |                           |       |                             |                             |       |
| LC_33                                                        | On this unit, when a serious error occurs, we think about it carefully                                                               | F2                        | F2    | F2                          | F2                          | F2    |
| LC_35                                                        | On this unit, after a serious error has occurred, we think about how it came about and how to prevent the same mistake in the future | F2                        | F2    | F2                          | F2                          | F2    |
| LC_36                                                        | On this unit, when a serious error occurs, we analyze it thoroughly                                                                  | F2                        | F2    | F2                          | F2                          | F2    |
| LC_38                                                        | On this unit, after a serious error has occurred, we think long and hard about how to correct it                                     | F2                        | F2    | F2                          | F2                          | F2    |
| LC_34                                                        | On this unit, when people make a serious error, they ask others about how they could have prevented it                               | F2                        | F2    | *                           | n/a                         | n/a   |

| Item# <sup>¥</sup>                                                      | Item                                                                                               | Measurement models tested |       |                             |                             |       |
|-------------------------------------------------------------------------|----------------------------------------------------------------------------------------------------|---------------------------|-------|-----------------------------|-----------------------------|-------|
|                                                                         |                                                                                                    | EFA                       | CFA-1 | CFA-2<br>CFA-3 <sup>†</sup> | CFA-4<br>CFA-5 <sup>†</sup> | CFA-6 |
| <b>Enabling Open Communication I: judgment-free environment</b>         |                                                                                                    |                           |       |                             |                             |       |
| @11rev                                                                  | If I make a serious error my manager will think I am incompetent                                   | F3                        | F3    | F3                          | F3                          | F3    |
| @16rev                                                                  | My co-workers will lose respect for me if they know I've made a serious error                      | F3                        | F3    | F3                          | F3                          | F3    |
| @21rev                                                                  | Others make you feel like a bit of a failure when you make an error                                | F3                        | F3    | F3                          | F3                          | F3    |
| @7                                                                      | I would feel ashamed if I made a serious error and my co-workers heard about it                    | F3                        | F3    | *                           | n/a                         | n/a   |
| @10                                                                     | My co-workers will think I am incompetent if they know I've made a serious error                   | F3                        | F3    | *                           | n/a                         | n/a   |
| <b>Enabling Open Communication II: job repercussions of error error</b> |                                                                                                    |                           |       |                             |                             |       |
| @18rev                                                                  | Making a serious error may cause a staff member to lose his/her job.                               | F4                        | F4    | F4                          | F4                          | F4    |
| @25rev                                                                  | If I make a serious error I worry that I will face disciplinary action from management             | F4                        | F4    | F4                          | F4                          | F4    |
| @26rev                                                                  | Making a serious error would limit my career opportunities around here                             | F4                        | F4    | F4                          | F4                          | F4    |
| @3                                                                      | If I make a serious error I worry that I will face disciplinary action from the college            | F4                        | F4    | *                           | n/a                         | n/a   |
| SL_13                                                                   | I am rewarded for taking quick action to identify a serious error                                  | C/LL                      | *     | n/a                         | n/a                         | n/a   |
| @6                                                                      | When an incident is reported, it seems like the person is being written up, not the problem        | C/LL                      | *     | n/a                         | n/a                         | n/a   |
| @12                                                                     | On my unit, staff who report a <i>co-worker's</i> error are labelled as 'not being a team player'  | C/LL                      | *     | n/a                         | n/a                         | n/a   |
| @14                                                                     | My co-workers would support me if they learned of a serious error I made                           | C/LL                      | *     | n/a                         | n/a                         | n/a   |
| @28                                                                     | Individuals involved in patient safety incidents have a quick and easy way to report what happened | n/a                       | n/a   | n/a                         | n/a                         | n/a   |

<sup>¥</sup> Number notation indicates item dimension in the MSI 2010: item #s preceded by the @ sign were new in the MSI 2010, OL = Organizational leadership for safety, SL = supervisory leadership for safety, LC = unit learning culture

\* Item not well accounted for by previous model and was removed in the current model

n/a not included in the model

† Multiple-group CFA

C/LL Cross loading or low loading
